# Supplementary material
Source: Springer Nature journal article supplement (https://www.springermedizin.de/resource/supplementary/12990_2013_720_MOESM2_ESM.pdf/9612244)

# Na<sub>v</sub>s relative expression in L4/L5 DRGs

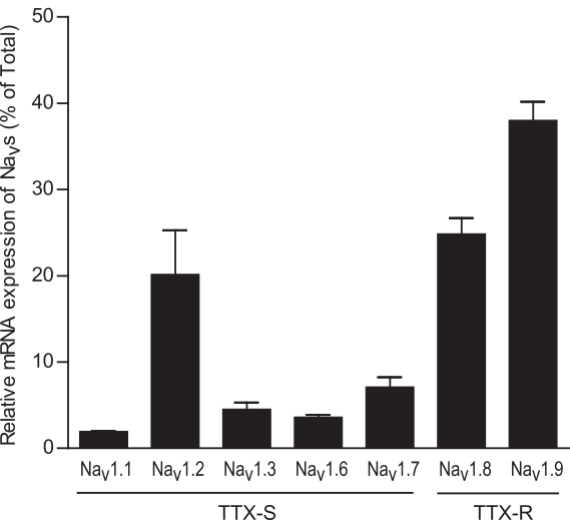

Supplement: MOESM2 [file 9612244]
